# Supplementary material for: Peptide-coated CdS quantum dots for the optical detection of copper(ii) and silver(i)
Source: Royal Society of Chemistry journal article supplement (doi:10.1039/b308991f), 2003-01-01
Supplement: b308991f.doc [file b308991f.doc]

**Solid phase peptide synthesis:**

Peptide synthesis was accomplished via standard solid-phase 9-fluorenylmethoxycarbonyl (Fmoc) chemistry. Wang resin, 1.4 mmol/g, was used as the solid phase. Diisopropylcarbodiimide (DIC) and 1-hydroxylbenzotriazole (HOBT) *in situ* activation method was used for the coupling reactions. DMAP (4-dimethylaminopyridine) was utilized to attach only the first amino acid to the resin. Any un-reacted sites were quenched with acetic anhydride and pyridine. Fmoc groups were de-protected with 20% piperidine solution in DMF. Amino acids with reactive side chains were trityl-protected. Except for DMAP (0.1 equivalent with respect to resin), all reagents were introduced in excess, 2 equivalents. Reaction time was 3 h or 30 min to attach the first or subsequent amino acids, respectively. To wash in between reactions, the resin was rinsed 3xDMF, 3xDCM, 1xEther, 3xDCM, and 3xDMF. Peptide cleavage from resin was completed with CF3COOH/triisopropylsilane (95:5, v/v) for 3 h. The collected CF3COOH solution was concentrated through N2 blow-off. Peptide was collected and purified by washing three times with cold ether followed by freeze-drying under vacuum.

**Optical spectra measurements:**

Optical properties and metallic ions effect on PL of **(a)** TGA-coated and **(b)** MEA-coated CdS QDs in phosphate buffer, pH of 7.3, and excited with 350 nm. Ions and QDs had concentrations of 1x10-5 M for (a) and 5x10-5 M for (b).

Optical properties and metallic ions effect on PL of **(a)** Cys, **(b)** Gly-Gly-Cys, and **(c)** Gly-Gly-Leu-Leu-Cys coated CdS QDs in phosphate buffer, pH of 7.3, and excited with 350 nm. Ions and QDs had concentrations of 1x10-5 M in (a) and (c) and 3x10-5 M in (b).
